# Supplementary material for: Differing In Vitro Rooting and Flowering Responses of the Persian Violet to Low and High UV-C Irradiation
Source: MDPI journal article supplement (doi:10.3390/plants10122671), 2021-12-04
Supplement: s1 [file s1]

**Table S1.** Effect of low- and high-intensity UV-C with single or double irradiation for various durations on the number of ordinary and mutated Persian violet flowers after subsequent culturing for 8 weeks.

| Intensity | No. of Irradiations | Type of Flower | Time of Irradiation (h) |    |    |    |    |    |
|-----------|---------------------|----------------|-------------------------|----|----|----|----|----|
|           |                     |                | 0                       | 1  | 2  | 4  | 5  | 6  |
| Low       | single              | Ordinary       | 35                      | 33 | 35 | 36 | 35 | 34 |
|           |                     | Mutated        | -                       | -  | -  | -  | -  | -  |
|           |                     | Total          | 35                      | 33 | 35 | 36 | 35 | 34 |
|           | double              | Ordinary       | 35                      | 32 | 35 | 38 | 37 | 39 |
|           |                     | Mutated        | -                       | -  | -  | -  | 1  | 1  |
|           |                     | Total          | 35                      | 32 | 35 | 38 | 38 | 40 |
| High      | single              | Ordinary       | 35                      | 35 | 39 | 41 | 42 | 45 |
|           |                     | Mutated        | -                       | -  | -  | 11 | 16 | 11 |
|           |                     | Total          | 35                      | 35 | 39 | 52 | 58 | 56 |
|           | double              | Ordinary       | 35                      | 43 | 40 | 41 | 42 | 42 |
|           |                     | Mutated        | -                       | -  | 1  | 1  | 1  | 1  |
|           |                     | Total          | 35                      | 43 | 41 | 42 | 43 | 43 |

**Table S2.** Effect of low- and high-intensity UV-C with single or double irradiation for various durations on Persian violet flower percentage after subsequent culturing for 8 weeks.

| Intensity | No. of Irradiations | Time of Irradiation (h) |      |      |      |      |      |
|-----------|---------------------|-------------------------|------|------|------|------|------|
|           |                     | 0                       | 1    | 2    | 4    | 5    | 6    |
| Low       | single              | 58.3                    | 55   | 58.3 | 60   | 58.3 | 56.7 |
|           | double              | 58.3                    | 53.3 | 58.3 | 63.3 | 63.3 | 66.7 |
| High      | single              | 58.3                    | 58.3 | 65   | 68.3 | 86.7 | 93.3 |
|           | double              | 58.3                    | 71.7 | 68.3 | 70   | 71.7 | 71.7 |

The formula for calculating flower percentage is as follows: Flower percentage =  $(A/60) \times 100\%$ , where A is the total number of flowers produced in treatment.

**Table S3.** Effect of low- and high-intensity UV-C with single or double irradiation at various durations on the mutation percentage of Persian violet flowers after subsequent culturing for 8 weeks.

| Intensity | No. of Irradiations | Time of Irradiation (h) |   |     |      |      |      |
|-----------|---------------------|-------------------------|---|-----|------|------|------|
|           |                     | 0                       | 1 | 2   | 4    | 5    | 6    |
| Low       | single              | 0                       | 0 | 0   | 0    | 0    | 0    |
|           | double              | 0                       | 0 | 0   | 0    | 2.6  | 2.5  |
| High      | single              | 0                       | 0 | 0   | 21.2 | 27.6 | 19.6 |
|           | double              | 0                       | 0 | 2.4 | 2.4  | 2.3  | 2.3  |

The formula for calculating mutated flower percentage is as follows: Mutated flower percentage =  $(A/B) \times 100\%$ , where A is the total number of mutated flowers produced in treatment, and B is the total number of flowers produced in treatment.
